# Supplementary material for: Thermolysis and solid state NMR studies of NaB3H8, NH3B3H7, and NH4B3H8
Source: Royal Society of Chemistry journal article supplement (doi:10.1039/c2dt31365k), 2012-09-04
Supplement: c2dt31365k.pdf [file c2dt31365k.pdf]

## Thermolysis and solid state NMR studies of $\text{NaB}_3\text{H}_8$ , $\text{NH}_3\text{B}_3\text{H}_7$ and $\text{NH}_4\text{B}_3\text{H}_8$

Zhenguo Huang,<sup>a,b</sup> Mitch Eagles,<sup>c</sup> Spencer Porter,<sup>a</sup> Eric G. Sorte,<sup>c</sup> Beau Billet,<sup>b</sup> Robert L. Corey,<sup>d,c</sup> Mark S. Conradi<sup>c,\*</sup> and Ji-Cheng Zhao<sup>b,\*</sup>

<sup>a</sup> Institute for Superconducting and Electronic Materials, University of Wollongong, Wollongong, New South Wales 2522, Australia. Fax: 61 2 4221 5731; Tel: 61 2 4221 3220.

<sup>b</sup> Department of Materials Science and Engineering, The Ohio State University, Columbus, OH, 43210, USA. Fax: 1 614 292 1537; Tel: 1 614 292 9462. E-mail: zhao.199@osu.edu.

<sup>c</sup> Washington University, Dept. of Physics - 1105, 1 Brookings Drive, St. Louis, Missouri 63130. Fax: 1 314 935 6219; Tel: 1 314 935 6292. E-mail: msc@wuphys.wustl.edu.

<sup>d</sup> Department of Physics, South Dakota School of Mines and Technology, 501 East Saint Joseph Street, Rapid City, SD 57701, USA.

*Supporting Information*

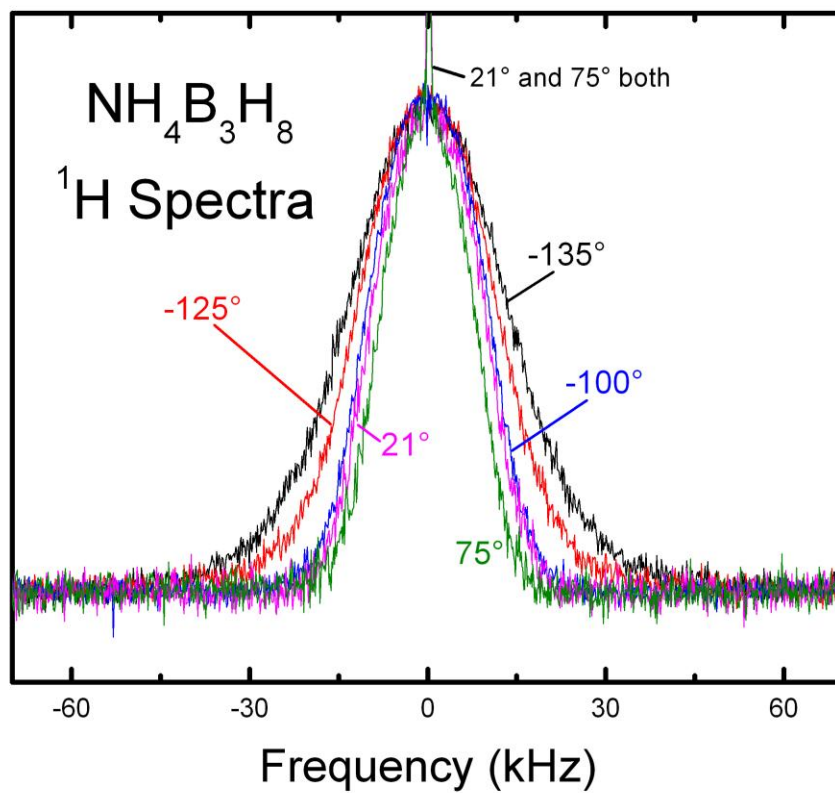

Figure S1: Hydrogen NMR spectra of  $\text{NH}_4\text{B}_3\text{H}_8$ .

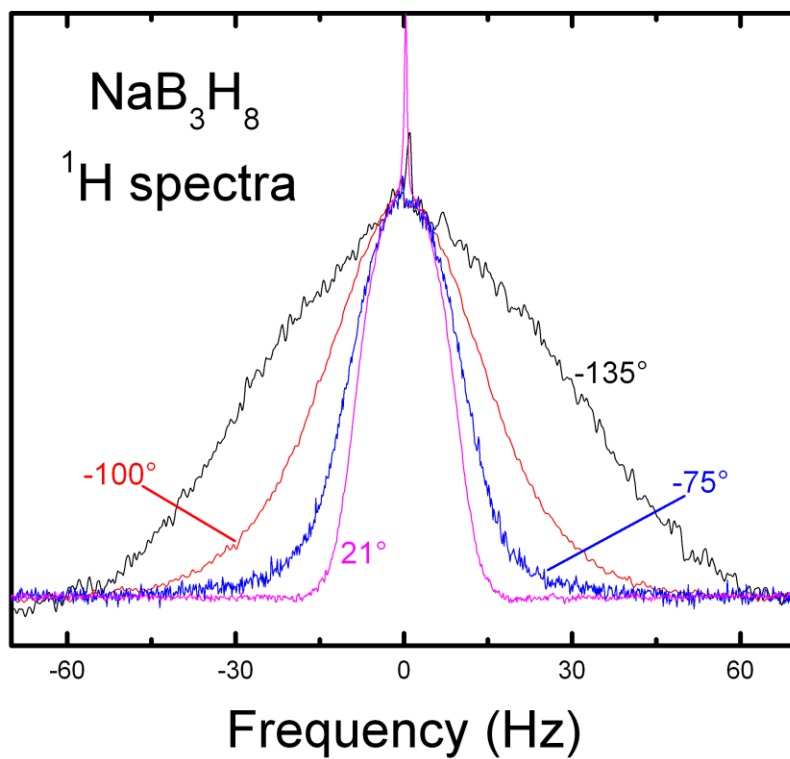

Figure S2: Hydrogen NMR spectra of  $\text{NaB}_3\text{H}_8$ .

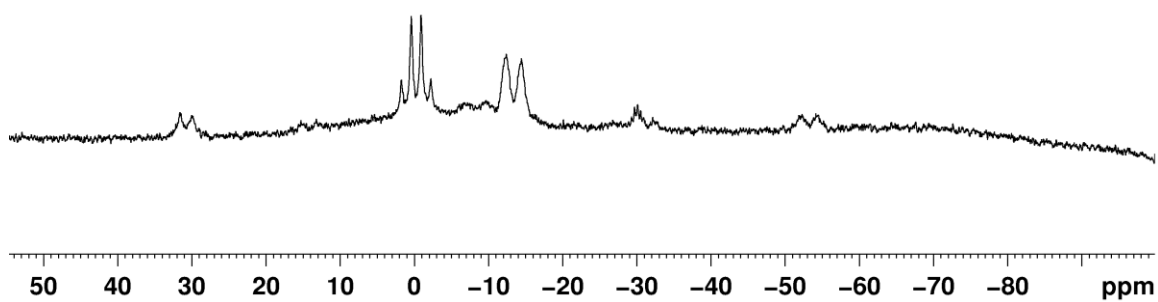

Figure S3:  $^{11}\text{B}$  NMR spectrum of gaseous decomposition products from  $\text{NH}_4\text{B}_3\text{H}_8$ /silica mixture dissolved in THF.  $\text{B}_2\text{H}_6$  (exists as  $\text{THF}\cdot\text{BH}_3$ ,  $\delta$  0 ppm);  $\text{B}_5\text{H}_9$  ( $\delta$  -13.9, -53.8 ppm);  $\text{B}_3\text{N}_3\text{H}_6$  ( $\delta$  30.8 ppm), and  $\text{B}_2\text{NH}_7$  ( $\delta$  -27.5 ppm) were detected.

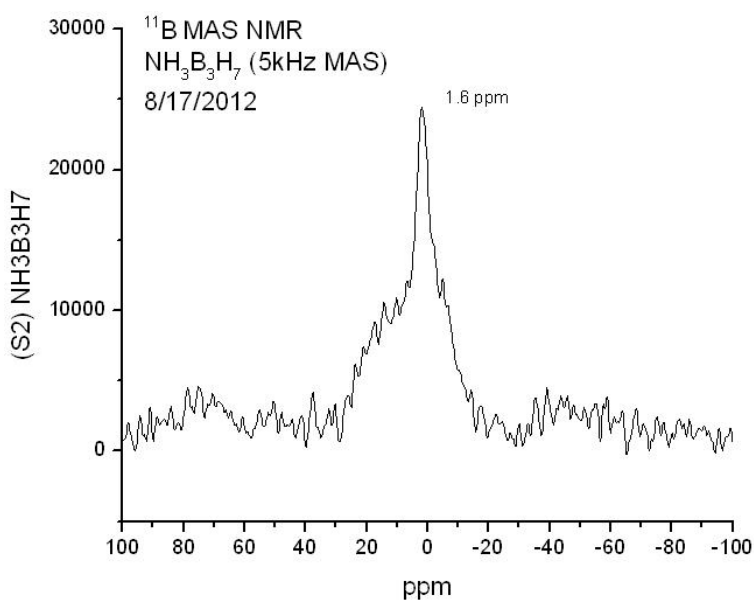

Figure S4: <sup>11</sup>B NMR spectrum of solid residue after the decomposition of NH<sub>3</sub>B<sub>3</sub>H<sub>7</sub>. The peak at δ 1.6 ppm is associated with B(OH)<sub>4</sub><sup>-</sup>.

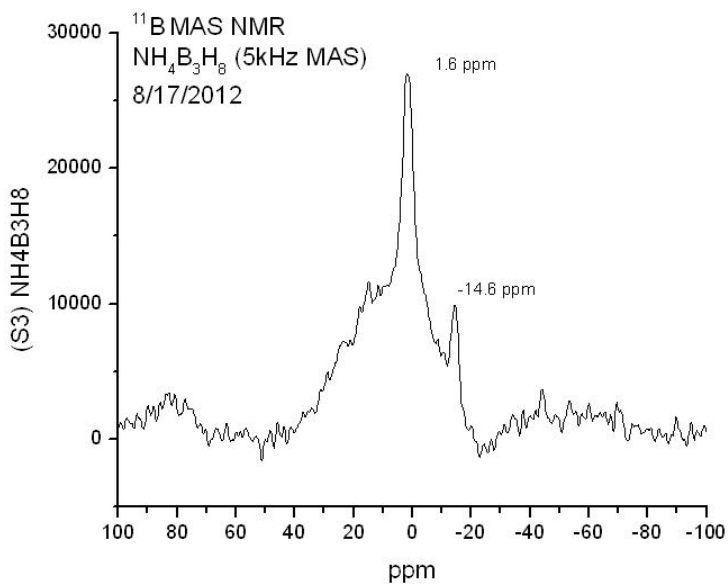

Figure S5: <sup>11</sup>B NMR spectrum of solid residue after the decomposition of NH<sub>4</sub>B<sub>3</sub>H<sub>8</sub>. The peak at δ -14.6 ppm is associated with B<sub>12</sub>H<sub>12</sub><sup>2-</sup>, and δ 1.6 ppm is associated with B(OH)<sub>4</sub><sup>-</sup>.
